# Supplementary material for: Abnormal glycogen chain length pattern, not hyperphosphorylation, is critical in Lafora disease
Source: PubMed Central journal article supplement (PMC5494504; doi:10.15252/emmm.201707608), 2017-05-23
Supplement: EMMM-9-906-s001.pdf [file EMMM-9-906-s001.pdf]

# Appendix

## Manuscript title:

Abnormal glycogen chain length pattern, not hyperphosphorylation, is critical in Lafora disease

## Table of contents

| <b>Item</b>       | <b>Reference in main text</b> | <b>Page in this document</b> |
|-------------------|-------------------------------|------------------------------|
| Appendix Table S1 | Figure 1                      | 2                            |
| Appendix Table S2 | Figure 3                      | 3                            |
| Appendix Table S3 | Figure 4                      | 3                            |
| Appendix Table S4 | Figure 5                      | 4                            |

## Appendix Table S1.

Holm-Bonferroni corrected p values of post-hoc tests in Figure 1. Not all p values are depicted in the figure.

|                  | <b>group 1</b>                   | <b>group 2</b>                        | <b>post-hoc p-value</b>                                          |                                                                       |  |
|------------------|----------------------------------|---------------------------------------|------------------------------------------------------------------|-----------------------------------------------------------------------|--|
| <b>Figure 1a</b> | WT                               | <i>Epm2a</i> <sup>-/-</sup>           | 2.31E-04                                                         |                                                                       |  |
|                  | <i>Epm2a</i> <sup>-/-</sup>      | <i>Epm2a</i> <sup>-/-</sup> .Laf      | 3.29E-04                                                         |                                                                       |  |
|                  | <i>Epm2a</i> <sup>-/-</sup>      | <i>Epm2a</i> <sup>-/-</sup> .C265SLaf | 2.82E-04                                                         |                                                                       |  |
| <b>Figure 1b</b> | WT                               | <i>Epm2a</i> <sup>-/-</sup>           | 4.96E-05                                                         |                                                                       |  |
|                  | WT                               | <i>Epm2a</i> <sup>-/-</sup> .C265SLaf | 2.55E-05                                                         |                                                                       |  |
|                  | <i>Epm2a</i> <sup>-/-</sup>      | <i>Epm2a</i> <sup>-/-</sup> .Laf      | 5.63E-05                                                         |                                                                       |  |
|                  | <i>Epm2a</i> <sup>-/-</sup> .Laf | <i>Epm2a</i> <sup>-/-</sup> .C265SLaf | 2.84E-05                                                         |                                                                       |  |
| <b>Figure 1c</b> | WT                               | <i>Epm2a</i> <sup>-/-</sup>           | 6.77E-07                                                         |                                                                       |  |
|                  | WT                               | <i>Epm2a</i> <sup>-/-</sup> .C265SLaf | 8.12E-08                                                         |                                                                       |  |
|                  | <i>Epm2a</i> <sup>-/-</sup>      | <i>Epm2a</i> <sup>-/-</sup> .Laf      | 4.83E-05                                                         |                                                                       |  |
|                  | <i>Epm2a</i> <sup>-/-</sup> .Laf | <i>Epm2a</i> <sup>-/-</sup> .C265SLaf | 1.08E-05                                                         |                                                                       |  |
|                  |                                  | <b>post-hoc p-value</b>               |                                                                  |                                                                       |  |
|                  | degree of polymerisation         | WT vs. <i>Epm2a</i> <sup>-/-</sup>    | <i>Epm2a</i> <sup>-/-</sup> vs. <i>Epm2a</i> <sup>-/-</sup> .Laf | <i>Epm2a</i> <sup>-/-</sup> vs. <i>Epm2a</i> <sup>-/-</sup> .C265SLaf |  |
| <b>Figure 1d</b> | 4                                | 1.90E-01                              | 2.31E-02                                                         | 3.95E-05                                                              |  |
|                  | 5                                | 1.22E-02                              | 4.14E-04                                                         | 3.63E-07                                                              |  |
|                  | 6                                | 7.05E-03                              | 1.33E-04                                                         | 1.96E-06                                                              |  |
|                  | 7                                | 1.30E-02                              | 2.32E-04                                                         | 7.24E-03                                                              |  |
|                  | 8                                | 5.05E-03                              | 9.43E-05                                                         | 7.32E-03                                                              |  |
|                  | 9                                | 4.47E-03                              | 1.82E-04                                                         | 1.26E-02                                                              |  |
|                  | 10                               | 1.44E-02                              | 2.42E-03                                                         | 2.41E-02                                                              |  |
|                  | 11                               | 1.95E-02                              | 2.09E-02                                                         | 7.95E-02                                                              |  |
|                  | 12                               | 6.09E-02                              | 7.75E-01                                                         | 4.24E-01                                                              |  |
|                  | 13                               | 1.30E-01                              | 1.50E-01                                                         | 1.36E-04                                                              |  |
|                  | 14                               | 6.58E-03                              | 1.25E-02                                                         | 2.95E-06                                                              |  |
|                  | 15                               | 2.69E-03                              | 2.41E-03                                                         | 9.41E-07                                                              |  |
|                  | 16                               | 4.96E-03                              | 3.89E-04                                                         | 2.11E-06                                                              |  |
|                  | 17                               | 2.59E-03                              | 1.06E-04                                                         | 1.19E-06                                                              |  |
|                  | 18                               | 2.31E-03                              | 5.18E-05                                                         | 2.12E-03                                                              |  |
|                  | 19                               | 8.75E-04                              | 1.90E-05                                                         | 6.41E-07                                                              |  |
|                  | 20                               | 1.34E-03                              | 2.08E-05                                                         | 1.02E-06                                                              |  |
|                  | 21                               | 1.31E-03                              | 1.27E-05                                                         | 5.26E-07                                                              |  |
|                  | 22                               | 1.19E-03                              | 1.24E-05                                                         | 4.94E-07                                                              |  |
|                  | 23                               | 1.75E-03                              | 2.95E-05                                                         | 3.25E-07                                                              |  |
|                  | 24                               | 1.47E-03                              | 8.01E-05                                                         | 3.57E-07                                                              |  |
|                  | 25                               | 1.39E-03                              | 7.29E-05                                                         | 2.57E-07                                                              |  |
|                  | 26                               | 1.42E-03                              | 4.06E-05                                                         | 1.99E-07                                                              |  |
|                  | 27                               | 2.00E-03                              | 5.12E-05                                                         | 2.97E-07                                                              |  |
|                  | 28                               | 2.43E-03                              | 2.92E-05                                                         | 1.38E-07                                                              |  |
|                  | 29                               | 1.94E-03                              | 2.13E-05                                                         | 2.83E-07                                                              |  |
|                  | 30                               | 3.42E-03                              | 2.69E-05                                                         | 4.19E-07                                                              |  |
|                  | 31                               | 1.57E-03                              | 1.32E-05                                                         | 5.89E-08                                                              |  |
|                  | 32                               | 2.88E-03                              | 2.73E-05                                                         | 1.10E-07                                                              |  |
|                  | 33                               | 2.00E-03                              | 4.27E-05                                                         | 4.35E-08                                                              |  |
|                  | 34                               | 4.05E-03                              | 2.57E-05                                                         | 4.38E-07                                                              |  |
|                  | 35                               | 6.46E-03                              | 2.40E-04                                                         | 4.71E-03                                                              |  |
|                  | 36                               | 2.27E-02                              | 8.14E-05                                                         | 9.38E-03                                                              |  |
|                  | 37                               | 8.46E-02                              | 3.99E-02                                                         | 2.49E-02                                                              |  |

## Appendix Table S2.

Holm-Bonferroni corrected p values of post-hoc tests in Figure 3.

|                  | group 1                     | group 2                               | post-hoc p-value |
|------------------|-----------------------------|---------------------------------------|------------------|
| <b>Figure 3a</b> | WT                          | <i>Epm2a</i> <sup>-/-</sup>           | 1.58E-03         |
|                  | <i>Epm2a</i> <sup>-/-</sup> | <i>Epm2a</i> <sup>-/-</sup> .Laf      | 1.37E-03         |
|                  | <i>Epm2a</i> <sup>-/-</sup> | <i>Epm2a</i> <sup>-/-</sup> .C265SLaf | 1.47E-03         |
| <b>Figure 3b</b> | WT                          | <i>Epm2a</i> <sup>-/-</sup>           | 1.82E-02         |
|                  | WT                          | <i>Epm2b</i> <sup>-/-</sup>           | 1.11E-04         |
|                  | WT                          | <i>Epm2b</i> <sup>-/-</sup> .C266SLaf | 1.21E-05         |
|                  | <i>Epm2a</i> <sup>-/-</sup> | <i>Epm2a</i> <sup>-/-</sup> .C266SLaf | 2.60E-02         |

## Appendix Table S3.

Holm-Bonferroni corrected p values of post-hoc tests in Figure 4.

|                  | group 1                          | group 2                               | post-hoc p-value |
|------------------|----------------------------------|---------------------------------------|------------------|
| <b>Figure 4a</b> | WT                               | <i>Epm2a</i> <sup>-/-</sup>           | 3.09E-04         |
|                  | WT                               | <i>Epm2a</i> <sup>-/-</sup> .C265SLaf | 6.84E-05         |
|                  | <i>Epm2a</i> <sup>-/-</sup>      | <i>Epm2a</i> <sup>-/-</sup> .Laf      | 1.00E-02         |
|                  | <i>Epm2a</i> <sup>-/-</sup> .Laf | <i>Epm2a</i> <sup>-/-</sup> .C265SLaf | 6.31E-03         |
| <b>Figure 4b</b> | WT                               | <i>Epm2a</i> <sup>-/-</sup>           | 1.45E-04         |
|                  | WT                               | <i>Epm2b</i> <sup>-/-</sup>           | 1.20E-02         |
|                  | WT                               | <i>Epm2a</i> <sup>-/-</sup> .C266SLaf | 1.63E-03         |
|                  | WT                               | <i>Epm2b</i> <sup>-/-</sup> .C266SLaf | 3.47E-02         |

## Appendix Table S4.

Holm-Bonferroni corrected p values of post-hoc tests in Figure 5. DP is degree of polymerisation. Not all p values are depicted in the figure.

| DP | Gayarre et al. tissue                    |                                                                             | Tissue generated in this study           |                                          |                                                    |                                                                             |
|----|------------------------------------------|-----------------------------------------------------------------------------|------------------------------------------|------------------------------------------|----------------------------------------------------|-----------------------------------------------------------------------------|
|    | WT<br>vs.<br><i>Epm2a</i> <sup>-/-</sup> | <i>Epm2a</i> <sup>-/-</sup><br>vs.<br><i>Epm2a</i> <sup>-/-</sup> .C265SLaf | WT<br>vs.<br><i>Epm2a</i> <sup>-/-</sup> | WT<br>vs.<br><i>Epm2b</i> <sup>-/-</sup> | WT<br>vs.<br><i>Epm2b</i> <sup>-/-</sup> .C266SLaf | <i>Epm2a</i> <sup>-/-</sup><br>vs.<br><i>Epm2a</i> <sup>-/-</sup> .C266SLaf |
| 3  | 9.90E-01                                 | 1.11E+00                                                                    | 5.10E+00                                 | 7.81E-01                                 | 1.91E+00                                           | 2.85E+00                                                                    |
| 4  | 1.02E-03                                 | 1.35E-03                                                                    | 4.29E-02                                 | 9.14E-03                                 | 1.20E-02                                           | 2.22E-01                                                                    |
| 5  | 1.88E-06                                 | 1.09E-05                                                                    | 1.47E-03                                 | 2.92E-06                                 | 3.73E-04                                           | 7.25E-03                                                                    |
| 6  | 3.43E-07                                 | 3.06E-06                                                                    | 2.79E-04                                 | 6.20E-05                                 | 4.56E-04                                           | 6.17E-04                                                                    |
| 7  | 4.26E-08                                 | 9.62E-07                                                                    | 1.33E-04                                 | 4.96E-05                                 | 1.28E-04                                           | 1.77E-04                                                                    |
| 8  | 2.14E-07                                 | 4.34E-06                                                                    | 6.13E-04                                 | 9.32E-05                                 | 1.97E-04                                           | 8.40E-03                                                                    |
| 9  | 1.94E-06                                 | 1.32E-05                                                                    | 1.04E-04                                 | 1.10E-04                                 | 2.33E-04                                           | 2.04E-04                                                                    |
| 10 | 1.69E-06                                 | 9.02E-06                                                                    | 8.92E-05                                 | 2.20E-04                                 | 3.16E-04                                           | 8.71E-05                                                                    |
| 11 | 1.08E-05                                 | 3.86E-05                                                                    | 4.80E-05                                 | 3.53E-04                                 | 4.56E-04                                           | 9.92E-05                                                                    |
| 12 | 7.91E-04                                 | 2.75E-03                                                                    | 5.19E-05                                 | 2.89E-03                                 | 3.62E-03                                           | 2.02E-04                                                                    |
| 13 | 1.34E-03                                 | 1.65E-02                                                                    | 4.01E-01                                 | 1.17E+00                                 | 6.26E-01                                           | 3.53E-01                                                                    |
| 15 | 3.32E-05                                 | 1.05E-04                                                                    | 2.81E-02                                 | 3.88E-02                                 | 4.67E-02                                           | 1.82E-02                                                                    |
| 16 | not applicable                           | not applicable                                                              | 2.38E-02                                 | 3.71E-03                                 | 7.42E-03                                           | 2.32E-02                                                                    |
| 17 | 2.93E-07                                 | 3.74E-06                                                                    | 1.82E-04                                 | 8.55E-06                                 | 6.21E-05                                           | 5.83E-04                                                                    |
| 18 | 4.54E-02                                 | 4.45E-01                                                                    | 9.24E-05                                 | 1.60E-05                                 | 8.59E-05                                           | 1.52E-04                                                                    |
| 19 | 7.04E-07                                 | 6.19E-06                                                                    | 3.47E-04                                 | 1.74E-05                                 | 1.12E-04                                           | 1.44E-03                                                                    |
| 20 | 8.59E-08                                 | 1.46E-06                                                                    | 2.25E-04                                 | 2.19E-05                                 | 1.50E-04                                           | 5.79E-04                                                                    |
| 21 | not applicable                           | not applicable                                                              | 9.51E-05                                 | 1.35E-04                                 | 1.25E-04                                           | 1.55E-04                                                                    |
| 22 | 3.25E-05                                 | 8.19E-05                                                                    | 4.23E-04                                 | 2.53E-05                                 | 2.19E-04                                           | 1.75E-03                                                                    |
| 23 | 8.06E-04                                 | 4.80E-05                                                                    | 5.31E-04                                 | 1.22E-04                                 | 6.40E-04                                           | 6.49E-04                                                                    |
| 24 | 5.74E-05                                 | 3.46E-04                                                                    | 8.12E-04                                 | 2.57E-05                                 | 3.39E-04                                           | 2.59E-03                                                                    |
| 25 | 1.12E-04                                 | 2.07E-04                                                                    | 6.86E-04                                 | 2.59E-05                                 | 4.45E-04                                           | 2.01E-03                                                                    |
| 26 | 6.97E-05                                 | 3.52E-04                                                                    | 1.41E-03                                 | 3.09E-05                                 | 6.69E-04                                           | 4.94E-03                                                                    |
| 29 | 6.32E-05                                 | 1.85E-04                                                                    | 1.73E-03                                 | 4.32E-05                                 | 1.62E-03                                           | 6.73E-03                                                                    |
| 30 | 2.01E-04                                 | 5.93E-04                                                                    | 1.44E-03                                 | 4.49E-05                                 | 2.03E-03                                           | 1.56E-02                                                                    |
| 31 | 7.01E-01                                 | 2.67E-02                                                                    | 3.84E-03                                 | 3.53E-05                                 | 3.62E-03                                           | 9.69E-03                                                                    |
| 32 | 7.40E-04                                 | 1.30E-03                                                                    | 1.79E-03                                 | 3.81E-05                                 | 3.73E-03                                           | 6.29E-03                                                                    |
| 33 | 3.37E-04                                 | 1.07E-03                                                                    | 1.38E-03                                 | 3.73E-05                                 | 4.93E-03                                           | 4.51E-03                                                                    |
| 34 | 2.50E-04                                 | 9.21E-04                                                                    | 1.63E-03                                 | 8.06E-05                                 | 9.32E-03                                           | 4.53E-03                                                                    |
| 35 | 3.33E-05                                 | 2.54E-04                                                                    | 1.61E-03                                 | 1.26E-04                                 | 1.39E-02                                           | 8.82E-03                                                                    |
| 36 | 5.85E-04                                 | 1.51E-03                                                                    | 6.48E-04                                 | 2.42E-04                                 | 1.60E-02                                           | 2.59E-03                                                                    |
