# Supplementary material for: Abnormal glycogen chain length pattern, not hyperphosphorylation, is critical in Lafora disease
Source: PubMed Central journal article supplement (PMC5494504; doi:10.15252/emmm.201707608), 2017-05-23

## Figure 2

Wild-type, no transgene

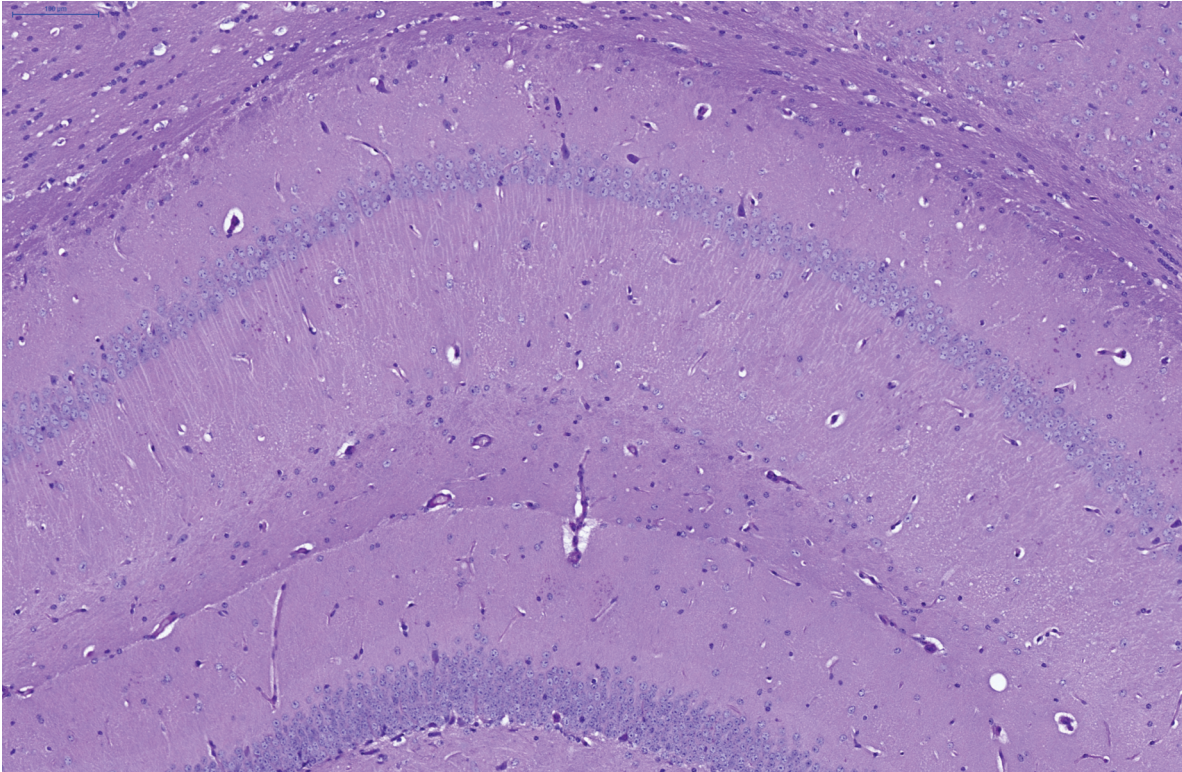

*Epm2a*<sup>-/-</sup>, no transgene

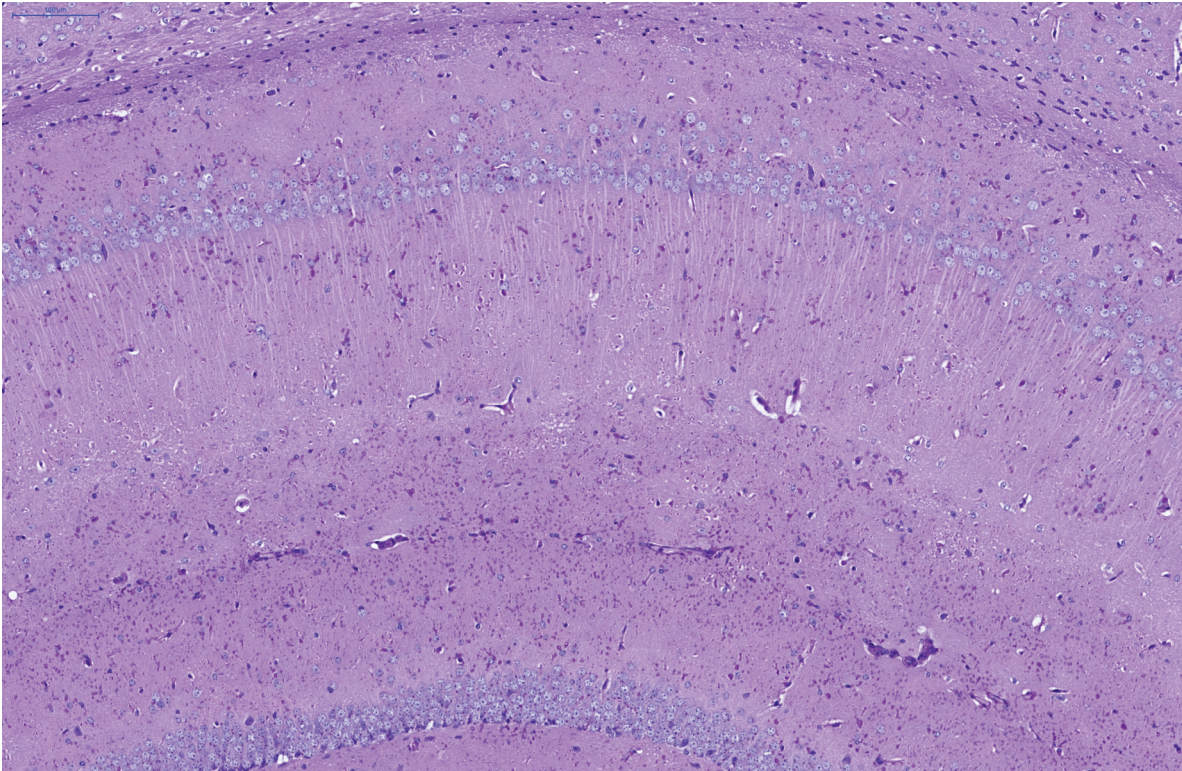

## Figure 2

*Epm2b*<sup>-/-</sup>, no transgene

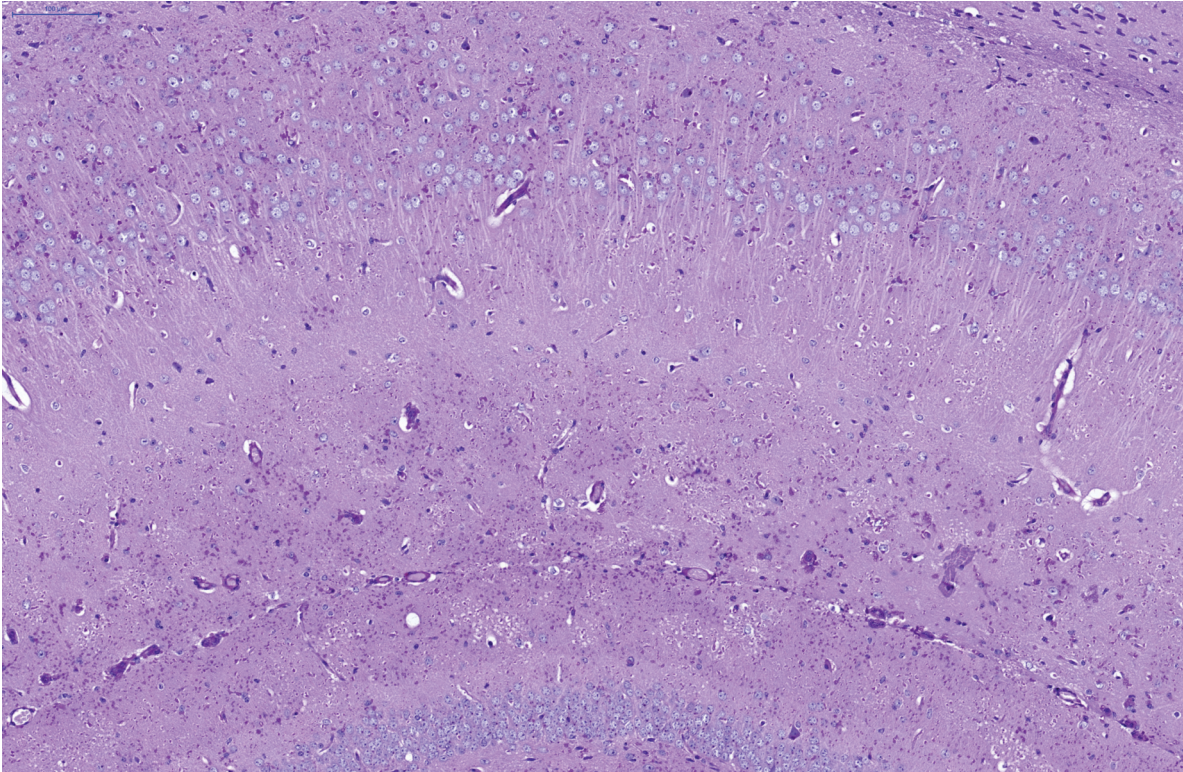

Wild-type.C266SLaf

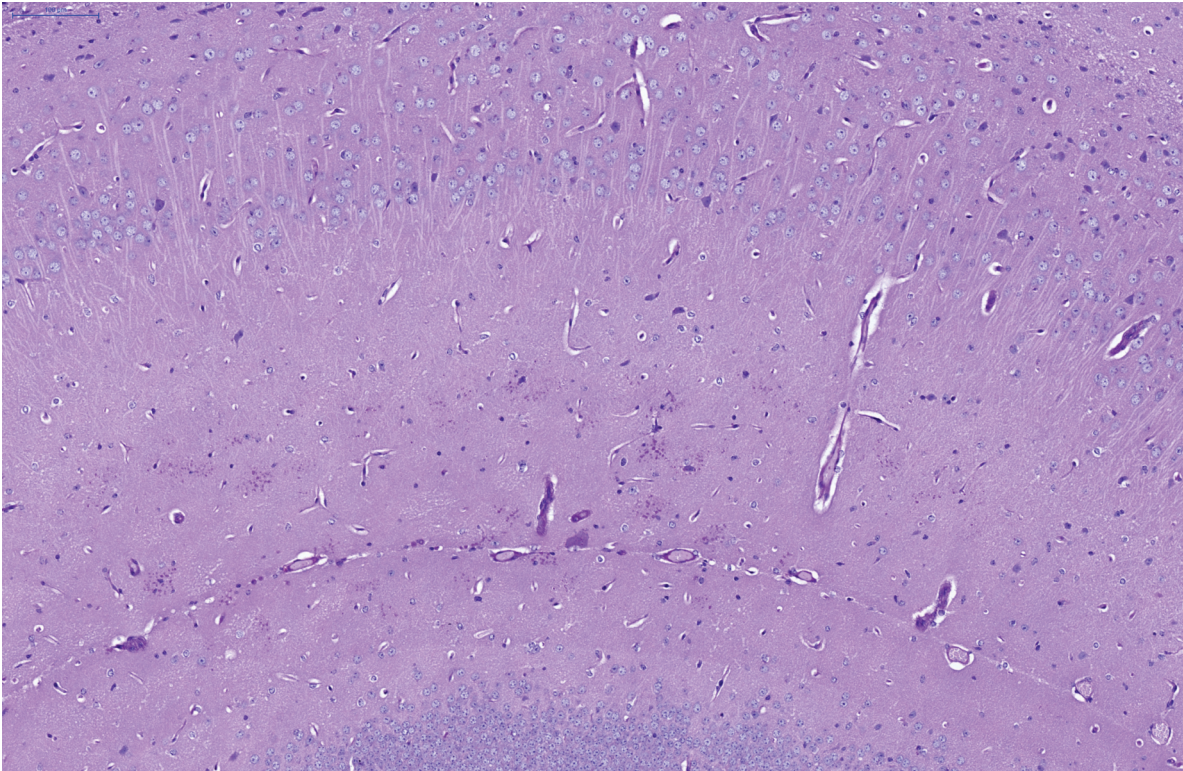

## Figure 2

*Epm2a*<sup>-/-</sup>.C266SLaf

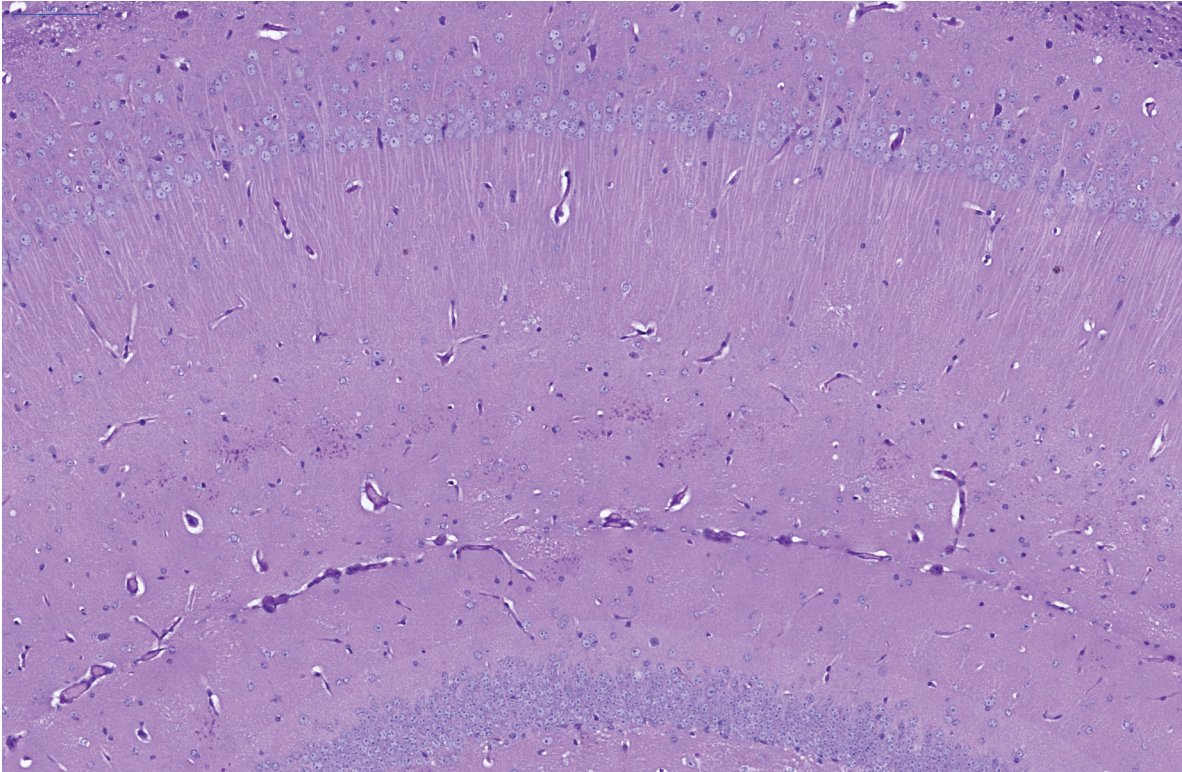

*Epm2b*<sup>-/-</sup>.C266SLaf

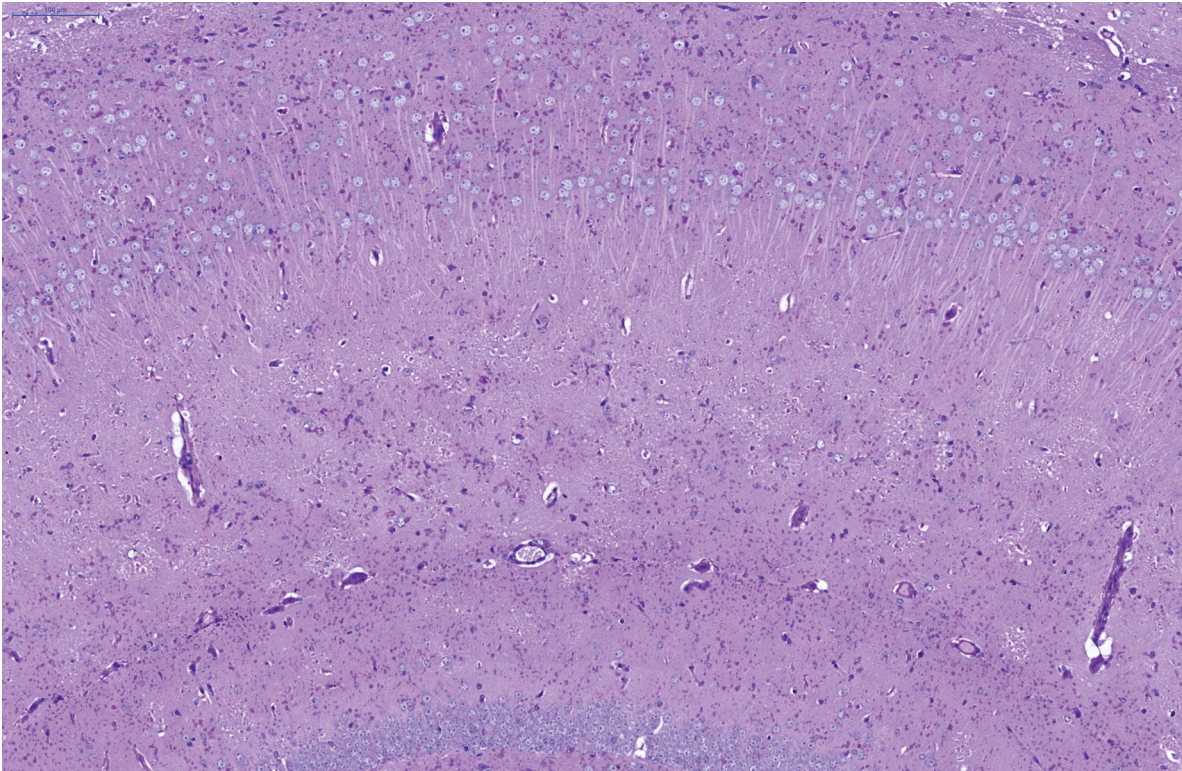

Supplement: EMMM-9-906-s002.pdf [file EMMM-9-906-s002.pdf]
